# Supplementary material for: The Alien Plant Species Impact in Rice Crops in Northwestern Italy
Source: MDPI journal article supplement (doi:10.3390/plants12102012), 2023-05-17
Supplement: s1 [file s1]

## Supplementary materials

**Table S1.** Floristic list. Abbreviations: Ch = chamaephyte, G = geophyte, H = hemicryptophyte, I = hydrophyte; He = helophyte, P = phanerophyte, T = therophyte, bulb = bulbous, caesp = caespitose, nat = floating, rad = rooted, rept = reptant, rhiz = rhizomatose, scap = scapose.

| Taxon                                                       | Life form | Chorotype         | Exoticity            | IUCN (Italy) | Site 1 | Site 2 | Site 3 |
|-------------------------------------------------------------|-----------|-------------------|----------------------|--------------|--------|--------|--------|
| <i>Alisma plantago-aquatica</i> L.                          | I rad     | Sub-Cosmopolitan  | Native               |              | X      | X      | X      |
| <i>Amaranthus retroflexus</i> L.                            | T scap    | N-American        | Invasive neophyte    |              |        | X      |        |
| <i>Ammania verticillata</i> (Ard.) Lam.                     | T scap    | W-Asiatic         | Random neophyte      |              | X      | X      | X      |
| <i>Artemisia vulgaris</i> L.                                | H scap    | Euro-Asiatic      | Native               |              |        | X      |        |
| <i>Bidens frondosa</i> L.                                   | T scap    | N-American        | Invasive neophyte    |              | X      | X      | X      |
| <i>Butomus umbellatus</i> L.                                | I rad     | Euro-Asiatic      | Native               |              |        | X      | X      |
| <i>Calamagrostis epigejos</i> (L.) Roth                     | H caesp   | Sibero-European   | Native               |              |        | X      |        |
| <i>Commelina communis</i> L.                                | G bulb    | E-Asiatic         | Invasive neophyte    |              |        | X      |        |
| <i>Cyperus glomeratus</i> L.                                | T scap    | Paleo-Subtropical | Native               |              |        | X      | X      |
| <i>Cyperus strigosus</i> L.                                 | H caesp   | N-American        | Naturalized neophyte |              |        | X      |        |
| <i>Echinocloa crus-galli</i> (L.) P. Beauv.                 | T scap    | Sub-Cosmopolitan  | Native               |              | X      | X      | X      |
| <i>Eleocharis acicularis</i> (L.) Roem. & Schult.           | G rhiz    | Sub-Cosmopolitan  | Native               |              |        | X      | X      |
| <i>Eleocharis flavescens</i> (Poir.) Urb.                   | T scap    | N-American        | Invasive neophyte    |              | X      |        |        |
| <i>Elymus repens</i> (L.) Gould                             | G rhiz    | Circumboreal      | Native               |              | X      |        |        |
| <i>Erigeron canadensis</i> L.                               | T scap    | N-American        | Invasive neophyte    |              | X      | X      |        |
| <i>Heteranthera limosa</i> (Sw.) Willd.                     | I rad     | American          | Random neophyte      |              | X      |        |        |
| <i>Heteranthera reniformis</i> Ruiz & Pav.                  | I rad     | Neotropical       | Invasive neophyte    |              | X      | X      | X      |
| <i>Hypericum perforatum</i> L.                              | H scap    | Cosmopolitan      | Native               |              | X      |        |        |
| <i>Juncus conglomeratus</i> L.                              | G rhiz    | Sibero-European   | Native               |              | X      |        |        |
| <i>Lemna minor</i> L.                                       | I nat     | Sub-Cosmopolitan  | Native               |              |        | X      | X      |
| <i>Lindernia dubia</i> (L.) Pennell                         | T scap    | N-American        | Invasive neophyte    |              | X      | X      |        |
| <i>Lolium perenne</i> L.                                    | H caesp   | Circumboreal      | Native               |              | X      |        |        |
| <i>Lythrum salicaria</i> L.                                 | H scap    | Sub-Cosmopolitan  | Native               |              | X      |        |        |
| <i>Marsilea quadrifolia</i> L.                              | I rad     | Euro-Asiatic      | Native               | EN           |        |        | X      |
| <i>Murdannia keisak</i> (Hassk.) Hand.-Mazz.                | G bulb    | Asiatic           | Invasive neophyte    |              | X      |        |        |
| <i>Oryza sativa</i> L. var. <i>sylvatica</i> Chiappelli     | T scap    | Asiatic           | Invasive archeophyte |              |        | X      | X      |
| <i>Persicaria lapathifolia</i> (L.) Delarbre                | T scap    | Cosmopolitan      | Native               |              | X      | X      | X      |
| <i>Phragmites australis</i> (Cav.) Trin. ex Steud.          | G rhiz    | Sub-Cosmopolitan  | Native               |              |        |        | X      |
| <i>Polygonum aviculare</i> L.                               | T rept    | Cosmopolitan      | Native               |              | X      |        |        |
| <i>Portulaca oleracea</i> L.                                | T scap    | Paleotropical     | Cryptogenic          |              |        |        | X      |
| <i>Robinia pseudoacacia</i> L.                              | P caesp   | N-American        | Invasive neophyte    |              | X      |        |        |
| <i>Rotala densiflora</i> (Roth) Koehne                      | T scap    | Paleotropical     | Naturalized neophyte |              |        | X      | X      |
| <i>Salix alba</i> L. (pl.)                                  | P scap    | Paleotemperate    | Native               |              | X      |        |        |
| <i>Schoenoplectiella mucronata</i> (L.) J. Jung & H.K. Choi | He        | Cosmopolitan      | Native               |              | X      | X      | X      |
| <i>Setaria italica</i> subsp. <i>viridis</i> (L.) Thell.    | T scap    | Sub-Cosmopolitan  | Native               |              | X      |        |        |
| <i>Typha angustifolia</i> L.                                | G rhiz    | Circumboreal      | Native               |              |        | X      | X      |
| <i>Typha latifolia</i> L.                                   | G rhiz    | Cosmopolitan      | Native               |              | X      |        |        |
| <i>Veronica beccabunga</i> L.                               | H rept    | Euro-Asiatic      | Native               |              | X      |        |        |
